# Supplementary material for: Excessive Substitution of Fish Meal with Fermented Soybean Meal Induces Oxidative Stress by Impairing Glutathione Metabolism in Largemouth Bass (Micropterus salmoides)
Source: MDPI journal article supplement (doi:10.3390/antiox12122096), 2023-12-11
Supplement: s1 [file s1]

**Supplementary Table S1. Amino acid composition of the fermented soybean meal (% dry weight)**

| Amino acid                       |       |
|----------------------------------|-------|
| Essential amino acids (EAAs)     |       |
| Histidine                        | 1.13  |
| Threonine                        | 1.52  |
| Arginine                         | 3.10  |
| valine                           | 1.79  |
| Methionine                       | 0.45  |
| Phenylalanine                    | 2.44  |
| Isoleucine                       | 1.87  |
| leucine                          | 3.22  |
| lysine                           | 2.60  |
| Non-essential amino acids (EAAs) |       |
| Aspartate                        | 4.04  |
| Glutamate                        | 9.21  |
| Serine                           | 1.98  |
| Glycine                          | 1.63  |
| Alanine                          | 1.99  |
| Tyrosine                         | 1.54  |
| Proline                          | 2.56  |
| Total                            | 41.07 |

Tryptophan could not be determined because of degradation during acid hydrolysis

**Supplementary Table S2. Primer sequences of genes used for qRT-PCR.**

| Sequence Name | Forward 5'-3'                | Reverse 5'-3'                    | Accession number |
|---------------|------------------------------|----------------------------------|------------------|
| <i>gapdh</i>  | ACTGTCACCTCCTCATCTT          | CACGGTTGCTGTATCCAA               | XM_038711150.1   |
| <i>lat1</i>   | CCAAAGCACGACAGACCTACA        | ACCAACCTGGCATATTTACC             | XM_038706332.1   |
| <i>y+lat2</i> | TCTGCCCTCTTCTCCTATTCC        | TGTCACCTGCCACTGCATCACT           | XM_038700945.1   |
| <i>y+lat1</i> | TGGTGTAATGAACTGGACGAT        | GAGCCATGATGCAATTAAAGA            | XM_038731565.1   |
| <i>bcat2</i>  | CAGAACGAGGCGATAAAGAA         | CATTGGTCCAGTAGATGAAGAG           | XM_038706627.1   |
| <i>pept2</i>  | CACTGGTGGAGGTGAATGTTGT       | TTTAGGAGGGTCCTGAAGGTAT           | XM_038721077.1   |
| <i>odc1</i>   | TGCACTGATCCCGAGACCTA         | GGGCAGGGTTGATTACTGCT             | XM_038728782.1   |
| <i>gstol</i>  | CGCCAGAGAGCCAGATTAG          | CAGTCCTGAGACATCCTCGC             | XM_038737564.1   |
| <i>idh2</i>   | TATGACCTGGGTCTGCCGTA         | TTGCCATCAAGTTTGCCACG             | XM_038705628.1   |
| <i>rrm1</i>   | CGGCACTCTCCCATGATCTC         | CTGTGCAAAGGTTGCTGCAT             | XM_038694259.1   |
| <i>tnf-α</i>  | CTTCGTCTACAGCCAGGCATCG       | TTTGGCACACCGACCTCACC             | XM_038723994.1   |
| <i>il-6</i>   | GACTGGAGTGGCGGAAAGTGGA<br>GG | TTTCATCTTCTACAAACGCAGAC<br>AACGG | XM_038711438.1   |
| <i>il-1β</i>  | CGTGACTGACAGCAAAAAGAGG       | GATGCCCAGAGCCACAGTTC             | XM_038733429.1   |
| <i>sod1</i>   | TTATTTTGAGCAGGAGGG           | TTCTTGTTGTGGGGATTG               | XM_038708943.1   |
| <i>sod2</i>   | GGTCTCATTCCCCTTCTT           | TCGCTCACATTCTCCCAG               | XM_038727054.1   |
| <i>cat</i>    | TGAATGGCTATGGCTCTC           | AATCTGGGTTGGTGGAAG               | XM_038704976.1   |
| <i>gpx1b</i>  | CTCCTCAACCAGGCAAAC           | ATACCCCCCTCACAACAA               | XM_038697919.1   |
| <i>keap1</i>  | AGACGGCAGGAGATGTTGT          | CATGGCTCTGAAGTAGGGG              | XM_038728593.1   |
| <i>nrf2</i>   | CACCAAAGACAAGCGTAAG          | GAAATCATCAACAGGCAGA              | XM_038720536.1   |

*Gapdh*, Glyceraldehyde-3-phosphate dehydrogenase; *lat1*, Solute carrier family 7 member 5; *y+lat2*, Solute carrier family 7 member 6; *y+lat1*, Solute carrier family 7 member 7; *bcat2*, Branched-chain-amino-acid aminotransferase, mitochondrial; *pept2*, Solute carrier family 15 member 2; *odc1*, Ornithine decarboxylase 1; *gstol*, Glutathione S-transferase omega-1; *idh2*, Isocitrate dehydrogenase [NADP], mitochondrial; *rrm1*, Ribonucleoside-diphosphate reductase large subunit 1; *tnf-α*, tumor necrosis factor-α; *il-6*, Interleukin 6; *il-1β*, Interleukin 1β; *sod1*, Superoxide dismutase [Cu-Zn]; *sod2*, Superoxide dismutase [Mn], mitochondrial; *cat*, Catalase; *gpx1b*, Glutathione peroxidase 1b; *keap1*, Kelch-like ECH-associated protein 1; *nrf2*, Nuclear factor erythroid 2-related factor 2

**Supplementary Table S3. The normality and homoscedasticity analysis of Figure 1**

| Indexes | P value of normality <sup>1</sup> | P value of homoscedasticity <sup>2</sup> | P value <sup>3</sup> |
|---------|-----------------------------------|------------------------------------------|----------------------|
| FBW     | 0.156/0.415                       | 0.797                                    | 0.002                |
| WG      | 0.250/0.283                       | 0.860                                    | 0.017                |
| SGR     | 0.211/0.274                       | 0.919                                    | 0.008                |
| FER     | 0.622/0.344                       | 0.446                                    | 0.005                |
| HSI     | 0.849/0.587                       | 0.166                                    | 0.007                |
| VSI     | 0.430/0.577                       | 0.068                                    | 0.042                |
| SR      | 0.156/0.126                       | 1.000                                    | 0.519                |

<sup>1</sup>  $P > 0.05$  indicates that the data conforms to a normal distribution;

<sup>2</sup>  $P > 0.05$  represents the variance of the data;

<sup>3</sup>  $P > 0.05$  indicates no significant difference in data.

**Supplementary Table S4. The normality and homoscedasticity analysis of Figure 2**

| Indexes      | P value of normality <sup>1</sup> | P value of homoscedasticity <sup>2</sup> | P value <sup>3</sup> |
|--------------|-----------------------------------|------------------------------------------|----------------------|
| Serum-his    | 0.338/0.439                       | 0.050                                    | 0.013                |
| Serum-thr    | 0.061/0.369                       | 0.457                                    | 0.144                |
| Serum-arg    | 0.835/0.497                       | 0.347                                    | 0.903                |
| Serum-val    | 0.715/0.454                       | 0.226                                    | 0.355                |
| Serum-met    | 0.589/0.597                       | 0.131                                    | 0.910                |
| Serum-trp    | 0.627/0.783                       | 0.129                                    | 0.557                |
| Serum-phe    | 0.460/0.722                       | 0.120                                    | 0.032                |
| Serum-ile    | 0.852/0.208                       | 0.217                                    | 0.360                |
| Serum-leu    | 0.644/0.098                       | 0.224                                    | 0.302                |
| Serum-lys    | 0.272/0.491                       | 0.057                                    | 0.270                |
| Serum-TEAAs  | 0.983/0.106                       | 0.517                                    | 0.948                |
| Serum-asp    | 0.152/0.703                       | 0.173                                    | 0.130                |
| Serum-glu    | 0.981/0.481                       | 0.652                                    | 0.920                |
| Serum-asn    | 0.726/0.891                       | 0.682                                    | 0.014                |
| Serum-ser    | 0.884/0.063                       | 0.738                                    | 0.618                |
| Serum-gln    | 0.441/0.670                       | 0.166                                    | 0.243                |
| Serum-gly    | 0.066/0.384                       | 0.420                                    | 0.007                |
| Serum-cit    | 0.323/0.703                       | 0.541                                    | 0.195                |
| Serum-ala    | 0.780/0.985                       | 0.186                                    | 0.766                |
| Serum-tau    | 0.849/0.453                       | 0.131                                    | 0.940                |
| Serum-tyr    | 0.610/0.202                       | 0.221                                    | 0.152                |
| Serum-orn    | 0.646/0.714                       | 0.064                                    | 0.007                |
| Serum-pro    | 0.188/0.118                       | 0.099                                    | 0.419                |
| Serum-TNEAAs | 0.185/0.065                       | 0.233                                    | 0.611                |
| Serum-TAAs   | 0.125/0.075                       | 0.242                                    | 0.684                |
| Muscle-his   | 0.926/0.073                       | 0.823                                    | 0.012                |
| Muscle-thr   | 0.518/0.406                       | 0.776                                    | 0.008                |
| Muscle-arg   | 0.994/0.400                       | 0.182                                    | 0.001                |
| Muscle-val   | 0.210/0.215                       | 0.585                                    | 0.349                |
| Muscle-met   | 0.949/0.054                       | 0.377                                    | 0.769                |
| Muscle-phe   | 0.533/0.884                       | 0.091                                    | 0.000                |
| Muscle-ile   | 0.587/0.908                       | 0.048                                    | 0.061                |
| Muscle-leu   | 0.996/0.246                       | 0.219                                    | 0.045                |
| Muscle-lys   | 0.966/0.900                       | 0.167                                    | 0.004                |
| Muscle-TEAAs | 0.370/0.305                       | 0.045                                    | 0.033                |
| Muscle-asp   | 0.134/0.630                       | 0.183                                    | 0.121                |
| Muscle-glu   | 0.724/0.930                       | 0.132                                    | 0.012                |
| Muscle-ser   | 0.216/0.952                       | 0.033                                    | 0.028                |
| Muscle-gly   | 0.186/0.541                       | 0.067                                    | 0.002                |
| Muscle-ala   | 0.066/0.909                       | 0.022                                    | 0.010                |

|               |             |       |       |
|---------------|-------------|-------|-------|
| Muscle-tyr    | 0.537/0.659 | 0.252 | 0.004 |
| Muscle-pro    | 0.285/0.725 | 0.154 | 0.000 |
| Muscle-TNEAAs | 0.869/0.778 | 0.305 | 0.000 |
| Muscle-TAAs   | 0.579/0.579 | 0.345 | 0.000 |
| Lat1          | 0.291/0.723 | 0.086 | 0.002 |
| Y+lat2        | 0.143/0.301 | 0.000 | 0.026 |
| Y+lat1        | 0.294/0.589 | 0.093 | 0.000 |
| Pept2         | 0.985/0.995 | 0.060 | 0.000 |
| Bcat2         | 0.191/0.353 | 0.041 | 0.022 |

<sup>1</sup> P > 0.05 indicates that the data conforms to a normal distribution;

<sup>2</sup> P > 0.05 represents the variance of the data;

<sup>3</sup> P > 0.05 indicates no significant difference in data.

**Supplementary Table S5. The normality and homoscedasticity analysis of Figure 3**

| Indexes     | P value of normality <sup>1</sup> | P value of homoscedasticity <sup>2</sup> | P value <sup>3</sup> |
|-------------|-----------------------------------|------------------------------------------|----------------------|
| AST         | 0.343/0.201                       | 0.510                                    | 0.010                |
| ALT         | 0.455/0.946                       | 0.395                                    | 0.003                |
| Serum CAT   | 0.420/0.935                       | 0.413                                    | 0.000                |
| Serum SOD   | 0.998/0.497                       | 0.213                                    | 0.007                |
| Serum T-AOC | 0.443/0.615                       | 0.792                                    | 0.001                |
| Liver SOD   | 0.480/0.233                       | 0.133                                    | 0.000                |
| Liver GSH   | 0.065/0.977                       | 0.260                                    | 0.017                |
| Liver CAT   | 0.144/0.978                       | 0.000                                    | 0.004                |
| Sod1 mRNA   | 0.167/0.923                       | 0.303                                    | 0.000                |
| Sod2 mRNA   | 0.597/0.805                       | 0.007                                    | 0.001                |
| cat mRNA    | 0.976/0.647                       | 0.026                                    | 0.004                |
| Nrf2 mRNA   | 0.600/0.828                       | 0.137                                    | 0.002                |
| Keap1 mRNA  | 0.455/0.280                       | 0.061                                    | 0.000                |

<sup>1</sup> P > 0.05 indicates that the data conforms to a normal distribution;

<sup>2</sup> P > 0.05 represents the variance of the data;

<sup>3</sup> P > 0.05 indicates no significant difference in data.

**Supplementary Table S6. The normality and homoscedasticity analysis of Figure 4**

| Indexes | P value of normality <sup>1</sup> | P value of homoscedasticity <sup>2</sup> | P value <sup>3</sup> |
|---------|-----------------------------------|------------------------------------------|----------------------|
| Odc1    | 0.761/0.149                       | 0.388                                    | 0.007                |
| Gsto1   | 0.703/0.219                       | 0.092                                    | 0.002                |
| Gpx1b   | 0.198/0.562                       | 0.000                                    | 0.020                |
| Idh2    | 0.812/0.468                       | 0.355                                    | 0.001                |
| Rrm1    | 0.438/0.626                       | 0.538                                    | 0.006                |

<sup>1</sup>  $P > 0.05$  indicate 0.436/0.626s that the data conforms to a normal distribution;

<sup>2</sup>  $P > 0.05$  represents the variance of the data;

<sup>3</sup>  $P > 0.05$  indicates no significant difference in data.

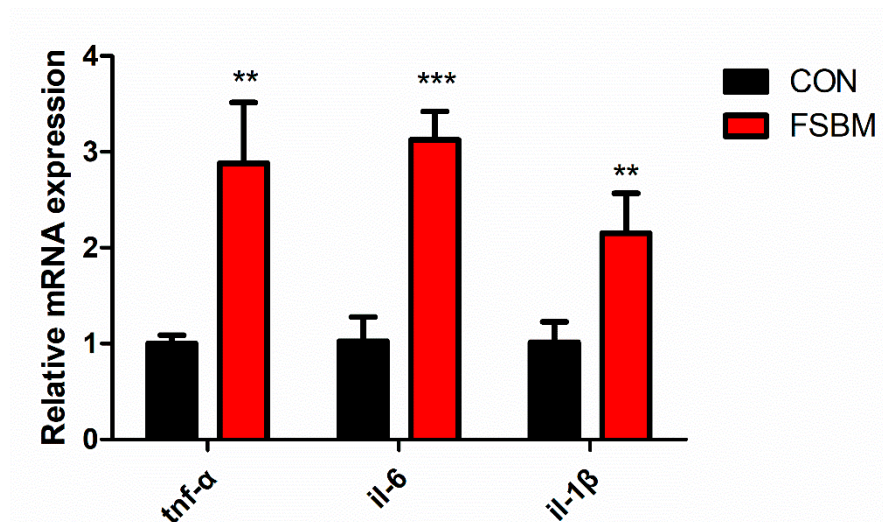

**Supplementary Figure S1** Effects of FSBM substitution on inflammatory response in liver of largemouth bass ( $n = 4$ ). The results are presented as the mean  $\pm$  SD and were analyzed using independent t-tests ( $*P < 0.05$ ,  $**P < 0.01$ ,  $***P < 0.001$ ).
